# Supplementary material for: Plasma homocysteine and cardiovascular outcomes in postmenopausal women with coronary heart disease: a retrospective cohort study
Source: Research Square preprint supplement (doi:10.21203/rs.3.rs-8671564/v1), 2026-02-03
Supplement: Supplementary file 1 [file 28ea86ba06c5e3f189f8b9d8.docx]

**Plasma homocysteine and cardiovascular outcomes in postmenopausal women with coronary heart disease: a retrospective cohort study**

**Supplementary Information**

Table S1. Univariate Cox Regression Analysis for Factors Associated with MACE.

Table S2. Assessment of confounding effects on the Hcy-MACE association using the change-in-estimate method.

Table S3. Final Selection of Covariates for Multivariable Model.

Table S4. Assessment of Multicollinearity for Variables in the Final Multivariable Model.

**Table S1.** **Univariate Cox Regression Analysis for Factors Associated with MACE**

| Variable | HR (95% CI) | *P* value |
| --- | --- | --- |
| **Demographics & Comorbidities** |  |  |
| Age | 1.03 (1.00, 1.05) | 0.0163 |
| BMI | 0.99 (0.95, 1.03) | 0.6435 |
| Hypertension | 2.86 (1.61, 5.08) | 0.0003 |
| Stroke | 2.35 (1.56, 3.53) | <0.0001 |
| Diabetes mellitus | 1.87 (1.27, 2.75) | 0.0016 |
| Smoking | 1.95 (1.11, 3.42) | 0.0194 |
| Alcohol use | 1.75 (0.95, 3.21) | 0.0717 |
| Dyslipidemia | 1.05 (0.67, 1.64) | 0.8387 |
| **Laboratory Parameters** |  |  |
| Homocysteine | 1.13 (1.10, 1.17) | <0.0001 |
| Glucose | 1.16 (1.09, 1.23) | <0.0001 |
| HDL-C | 0.37 (0.17, 0.81) | 0.0123 |
| Fibrinogen | 1.34 (1.05, 1.71) | 0.0206 |
| Neutrophil count | 1.07 (1.01, 1.14) | 0.0247 |
| RBC count | 0.71 (0.50, 1.01) | 0.0557 |
| TG | 1.15 (0.96, 1.37) | 0.1201 |
| WBC count | 1.05 (0.98, 1.12) | 0.1565 |
| Creatinine | 1.00 (1.00, 1.01) | 0.1233 |
| TC | 1.10 (0.93, 1.31) | 0.2573 |
| D-dimer | 1.04 (0.96, 1.13) | 0.2822 |
| Albumin | 0.98 (0.94, 1.02) | 0.3293 |
| Uric acid | 1.00 (1.00, 1.00) | 0.3566 |
| ALT | 1.00 (0.99, 1.01) | 0.3687 |
| LDL-C | 1.09 (0.88, 1.35) | 0.4264 |
| Platelet count | 1.00 (1.00, 1.00) | 0.6766 |
| **Medications** |  |  |
| Folic acid use | 3.22 (1.76, 5.91) | 0.0002 |
| Statin use | 1.67 (0.93, 3.00) | 0.0859 |
| Antiplatelet therapy | 1.40 (0.85, 2.30) | 0.1870 |
| ACEI/ARB use | 1.29 (0.87, 1.89) | 0.2028 |
| β-blocker use | 0.97 (0.66, 1.44) | 0.8973 |

**Abbreviations:** HR, hazard ratio; CI, confidence interval; MACE, major adverse cardiovascular events; BMI, body mass index; Hcy: Homocysteine; HDL-C, high-density lipoprotein cholesterol; RBC, red blood cell; TG, triglycerides; WBC, white blood cell; TC, total cholesterol; ALT, alanine aminotransferase; LDL-C, low-density lipoprotein cholesterol; ACEI/ARB, angiotensin-converting enzyme inhibitor/angiotensin receptor blocker.

**Table S2.** **Assessment of confounding effects on the Hcy-MACE association using the change-in-estimate method**

| Variable | β-coefficient of Hcy in Basic Model* | β-coefficient of Hcy in Full Model† | Selected as Confounder (Criterion 1)‡ |
| --- | --- | --- | --- |
| **Base Model (Hcy only)** | 0.1324 (Reference) | — | — |
| Age | 0.1306 | 0.1381 | Yes |
| HDL-C | 0.1307 | 0.1411 | Yes |
| Fibrinogen | 0.1306 | 0.1398 | Yes |
| Folic acid | 0.1248 | 0.1448 | Yes |
| Glucose | 0.1402 | 0.1365 | Yes |
| Hypertension | 0.1367 | 0.1367 | Yes |
| Diabetes | 0.1384 | 0.1386 | Yes |
| Stroke | 0.1320 | 0.1380 | Yes |
| Smoking | 0.1317 | 0.1407 | Yes |
| Neutrophil count | 0.1318 | 0.1375 | Yes |

*Hcy, homocysteine; MACE, major adverse cardiovascular events; HDL-C, high-density lipoprotein cholesterol.
*Basic Model: The model started with Hcy alone, and each variable was added individually to assess its confounding effect.
†Full Model: The model started with all candidate variables, and each variable was removed individually to assess its confounding effect.
‡Criterion 1: A variable was selected as an important confounder if its inclusion/exclusion altered the β-coefficient of Hcy by more than 10% in either the Basic or Full Model.

**Table S3.** **Final Selection of Covariates for Multivariable Model**

| Outcome | Exposure Variable | Selected Covariates (Criterion 1)* | Selected Covariates (Criterion 2)† |
| --- | --- | --- | --- |
| MACE | Homocysteine | Age, Hypertension, Diabetes, Stroke, Smoking, Glucose, HDL-C, Neutrophil count, Fibrinogen, Folic acid use | — |

*Criterion 1: Variable identified as an important confounder by the change-in-estimate method (>10% change).
†Criterion 2: Variable with a P-value <0.1 in univariate analysis. In this case, all covariates selected by Criterion 1 are listed. Other variables meeting only Criterion 2 can be added here if any.

**Table S4.** **Assessment of Multicollinearity for Variables in the Final Multivariable Model**

| Variable | Variance Inflation Factor (VIF) |
| --- | --- |
| Homocysteine | 1.1 |
| Age | 1.1 |
| Hypertension | 1.1 |
| Diabetes | 1.4 |
| Stroke | 1.1 |
| Smoking | 1.0 |
| Glucose | 1.4 |
| HDL-C | 1.1 |
| Neutrophil count | 1.1 |
| Fibrinogen | 1.1 |
| Folic acid | 1.1 |

Note: VIF, Variance Inflation Factor. A VIF value of 1 indicates no correlation between a variable and others, while a VIF value exceeding 5 or 10 is often considered indicative of substantial multicollinearity. All VIF values in the final model are well below the common threshold of 5, indicating the absence of significant multicollinearity that would compromise the stability of the regression estimates.
